# Supplementary material
Source: publisher figshare collection journal article supplement (https://acs.figshare.com/ndownloader/files/4699408)
Supplement: Supplementary file 1 [file 4699408]

## Supporting Information

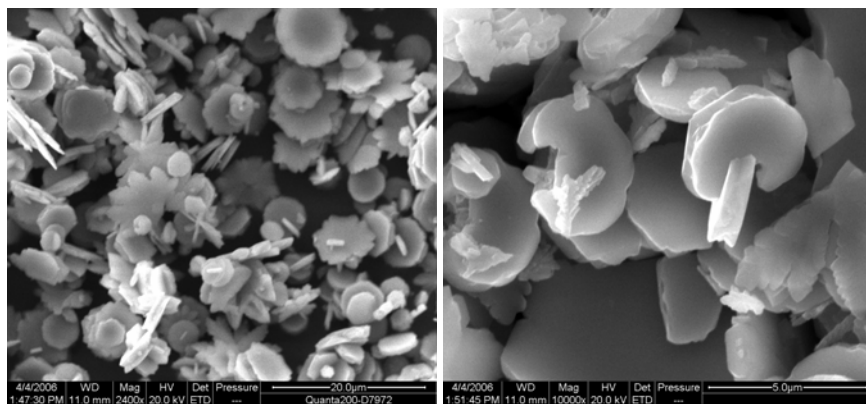

**Figure 1** SEM images of  $\alpha$ -Fe<sub>2</sub>O<sub>3</sub> crystal obtained with [Fe(CN)<sub>6</sub>]<sup>3-</sup>/NaOH molar ratio of 1/3.5.

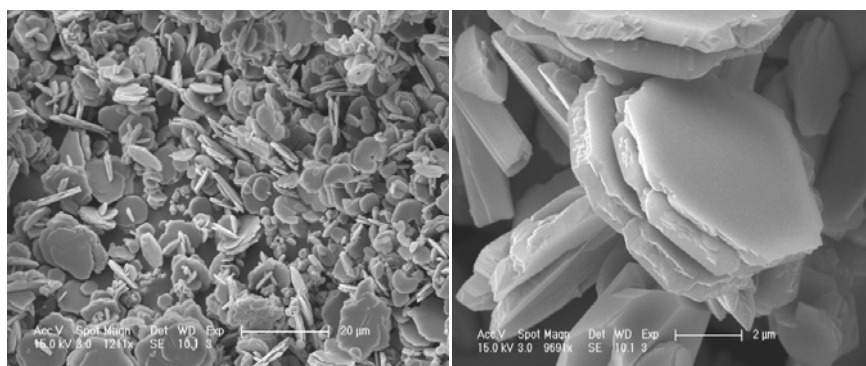

**Figure 2** SEM images of  $\alpha$ -Fe<sub>2</sub>O<sub>3</sub> crystal obtained with [Fe(CN)<sub>6</sub>]<sup>3-</sup>/NaOH molar ratio of 1/13.5
